# Supplementary material for: Neuroinflammation in post-acute sequelae of COVID-19 (PASC) as assessed by [11C]PBR28 PET correlates with vascular disease measures
Source: PubMed Central journal article supplement — bioRxiv. 2023 Oct 20:2023.10.19.563117. Preprint. [Version 1] doi: 10.1101/2023.10.19.563117 (PMC10614970; doi:10.1101/2023.10.19.563117), 2023-10-20
Supplement: media-1.pdf [file media-1.pdf]

991 **SUPPLEMENTAL FIGURES**

992

993 Supplemental Figure 1

994

995

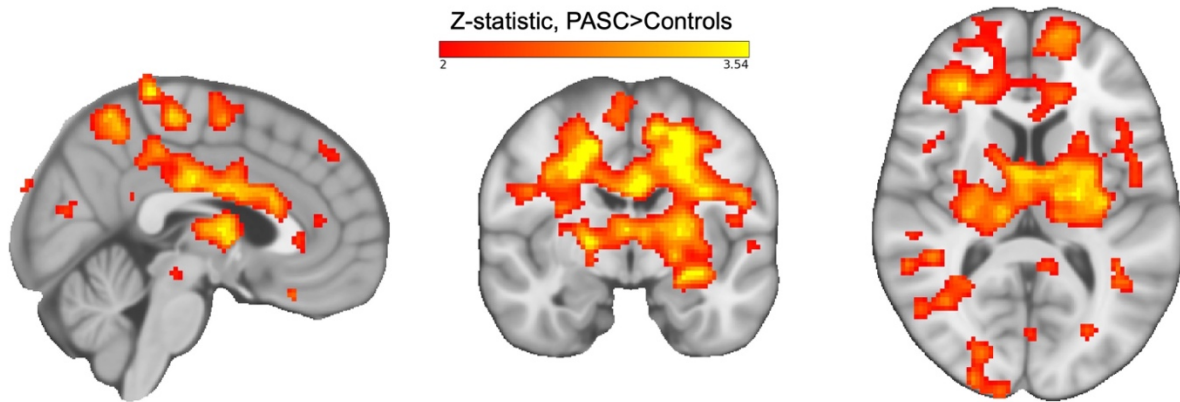

996

997

998 Supplemental Figure 1 legend:

999 To validate our primary results, we performed a second analysis using a paired

1000 approach in which each PASC participant was matched to a control participant for

1001 genotype, sex, and age  $\pm 5$  years. Because no control participant fit these criteria for one

1002 PASC participant, they were left out of the paired validation analysis. Genotype and sex

1003 were directly matched; neither age nor cerebellum SUV differed between cases and

1004 controls ( $p > 0.05$ ). Example slices through sagittal ( $x=3$ ), coronal ( $y=-7$ ), and axial ( $z=8$ )

1005 sections of the 11 PASC > 11 control group-level unpaired validation comparison,

1006 showing the pattern of increased [ $^{11}\text{C}$ ]PBR28 signal. Color bar: threshold min. Z score of

1007 2 and max. 3.54. (Figure is shown in neurological convention)

1008

1009 Supplemental Figure 2

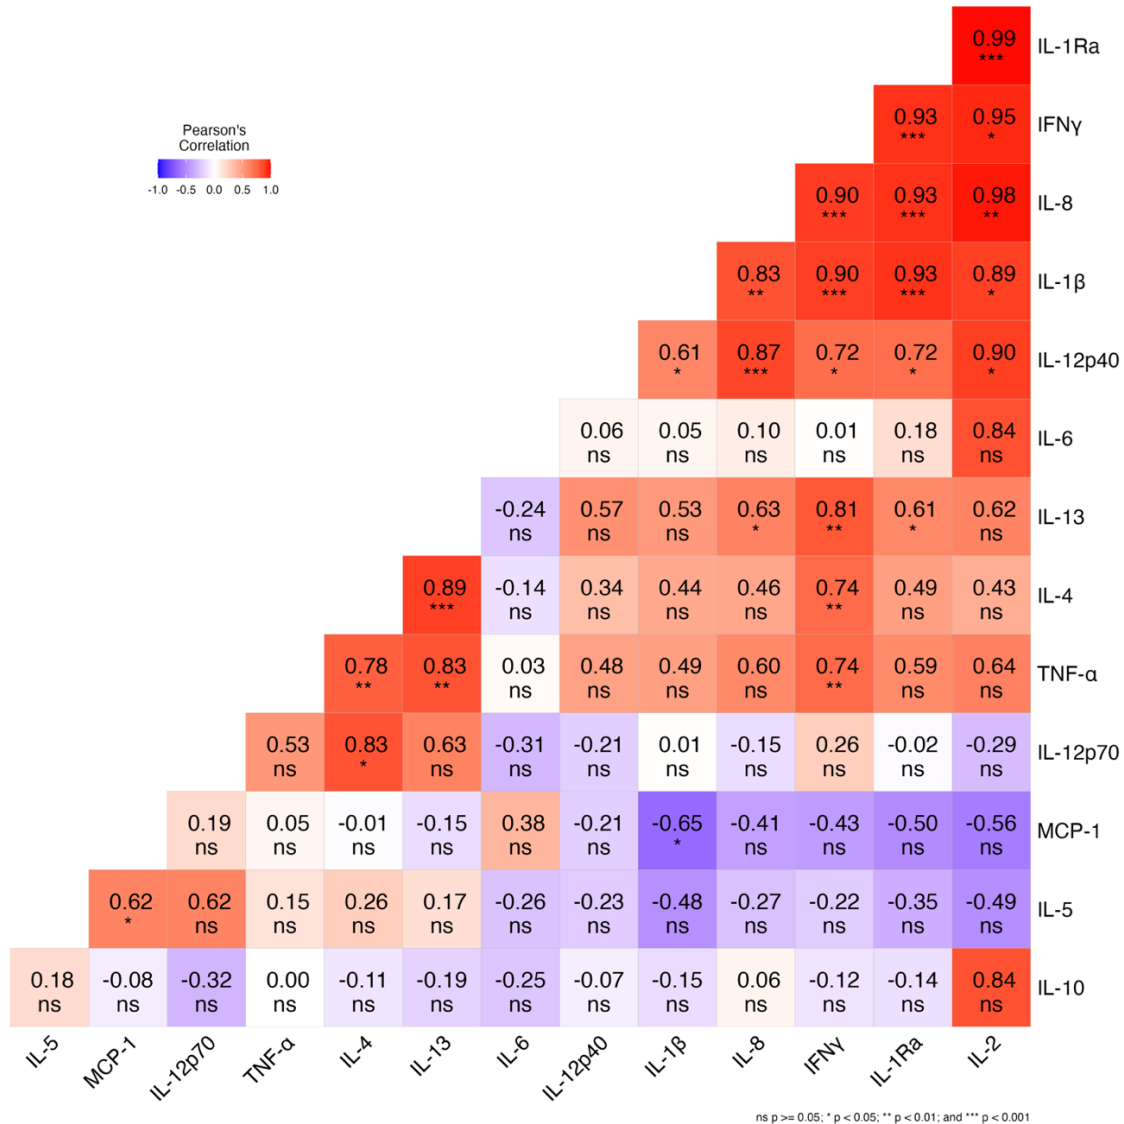

1010

1011 Supplemental Figure 2 legend:

1012 Correlation matrix showing relationships among cytokines from a 15 cytokine multiplex  
 1013 (Millipore HCYTA-60K Luminex magnetic bead panel performed by Eve Technologies,  
 1014 Calgary Canada), from the 11 PASC participants that provided platelet-poor plasma  
 1015 samples immediately before PET neuroimaging.

1016 Analytes included: GM-CSF, IFN $\gamma$ , IL-1 $\beta$ , IL-1RA, IL-2, IL-4, IL-5, IL-6, IL-8, IL-10, IL-  
 1017 12(p40), IL-12(p70), IL-13, MCP-1, TNF $\alpha$ . \* = p<0.05; \*\* = p<0.01; \*\*\* = p<0.001

1018 Supplemental Figure 3

1019

| <b>PASC participant</b> | <b>1</b> | <b>2</b> | <b>3</b> | <b>4</b> | <b>5</b> | <b>6</b> | <b>7</b> | <b>8</b> | <b>9</b> | <b>10</b> | <b>11</b> | <b>12</b> |
|-------------------------|----------|----------|----------|----------|----------|----------|----------|----------|----------|-----------|-----------|-----------|
| Headache                | 9        | 8        | 0        | 2        | 0        | 7        | 10       | 6        | 0        | 9         | 6         | 2         |
| Unrested                | 10       | 8        | 4        | 6        | 1        | 0        | 10       | 9        | 7        | 5         | 10        | 7         |
| Muscle } Pain           | 10       | 3        | 0        | 2        | 6        | 6        | 10       | 6        | 5        | 1         | 3         | 2         |
| Joint }                 |          |          |          |          |          |          |          |          |          |           |           |           |
| Short Term Memory       | 7        | 6        | 6        | 4        | 4        | 0        | 10       | 0        | 2        | 6         | 2         | 7         |
| Processing Information  | 9        | 6        | 6        | 6        | 4        | 0        | 10       | 3        | 3        | 6         | 3         | 5         |

1020

1021

1022 Supplemental Figure 3 legend:

1023 Each of the 12 PASC participants rated symptoms from the ICC “Neurological  
 1024 impairments” cluster on a 1-10 severity scale and marked their onset. For Pain, the ICC  
 1025 asked about "Significant pain" but the history questionnaire distinguished between  
 1026 muscle and joint pain.

1027 Light green = Not reported as a problem

1028 Orange = “This was a problem for me before COVID”

1029 Pink = "This is a problem for me since I had COVID"

1030 Red = "This is a serious problem for me since I had COVID"

1031

1032

1033

1034

1035

1036

## 1037 Supplemental Table 1

| <b>Affective items</b>         | PASC mean (SD)     | Control mean (SD)   |
|--------------------------------|--------------------|---------------------|
| Sadness                        | 0.58 (0.67)        | 0.095 (0.48)        |
| Pessimism                      | 0.67 (0.49)        | 0.024 (0.15)        |
| Sense of failure               | 0.00 (0.00)        | 0.024 (0.15)        |
| Dissatisfaction                | 0.67 (0.65)        | 0.095 (0.30)        |
| Guilt                          | 0.17 (0.39)        | 0.023 (0.15)        |
| Feeling of punishment          | 0.00 (0.00)        | 0.048 (0.22)        |
| Disappointment in self         | 0.17 (0.39)        | 0.024 (0.16)        |
| Self-criticism                 | 0.58 (0.51)        | 0.048 (0.22)        |
| Suicidal thoughts              | 0.083 (0.29)       | 0.00 (0.00)         |
| Crying episodes                | 0.42 (0.90)        | 0.048 (0.22)        |
| Irritability                   | 0.42 (0.51)        | 0.24 (0.69)         |
| Social withdrawal              | 0.50 (0.52)        | 0.048 (0.22)        |
| Indecisiveness                 | 1.00 (0.74)        | 0.00 (0.00)         |
| <b>Average affective items</b> | <b>0.40 (0.23)</b> | <b>0.055 (0.10)</b> |
| <b>Somatic Items</b>           |                    |                     |
| Change of body image           | 0.42 (0.51)        | 0.024 (0.15)        |
| Ability to work                | 1.17 (0.94)        | 0.073 (0.26)        |
| Sleep difficulties             | 0.75 (0.45)        | 0.17 (0.44)         |
| Fatigability                   | 1.42 (0.79)        | 0.073 (0.26)        |

|                              |                     |                     |
|------------------------------|---------------------|---------------------|
| Loss of Appetite             | 0.58 (0.79)         | 0.024 (0.15)        |
| Weight loss                  | 0.083 (0.29)        | 0.048 (0.22)        |
| Health anxiety               | 1.08 (0.67)         | 0.00 (0.00)         |
| Loss of libido               | 0.83 (1.03)         | 0.071 (0.26)        |
| <b>Average somatic items</b> | <b>0.79 (0.39)</b>  | <b>0.060 (0.13)</b> |
| <b>Total score averages</b>  | <b>11.58 (1.74)</b> | <b>1.14 (5.58)</b>  |

1038

1039 Supplemental Table 1 legend:

1040 PASC and Control participant means for BDI items within the affective and somatic  
1041 subscales of the BDI. A mixed-model ANOVA revealed a significant interaction driven by  
1042 high somatic item means within the PASC group.

1043

1044

1045
